# Supplementary material for: The Anti-Tumorigenic Role of Cannabinoid Receptor 2 in Non-Melanoma Skin Cancer
Source: MDPI journal article supplement (doi:10.3390/ijms24097773), 2023-04-24
Supplement: s1 [file s1]

Table S1. Spontaneous regression and new papilloma formation per mouse in WT and CB2<sup>-/-</sup> mice receiving DMBA/TPA cancer induction.

| Week  |                | WT     |        |        |       |        |        |        | CB2 <sup>-/-</sup> |       |       |       |        |       |       |
|-------|----------------|--------|--------|--------|-------|--------|--------|--------|--------------------|-------|-------|-------|--------|-------|-------|
| 0.00  |                | 0.00   | 0.00   | 0.00   | 0.00  | 0.00   | 0.00   | 0.00   | 0.00               | 0.00  | 0.00  | 0.00  | 0.00   | 0.00  | 0.00  |
| 17.00 |                | 1.00   | 2.00   | 1.00   | 0.00  | 1.00   | 1.00   | 1.00   | 3.00               | 2.00  | 2.00  | 4.00  | 5.00   | 0.00  | 0.00  |
|       | # of SR events | 0.00   | 0.00   | 0.00   | 0.00  | 0.00   | 0.00   | 0.00   | 0.00               | 0.00  | 0.00  | 0.00  | 0.00   | 0.00  | 0.00  |
|       | new papilloma  | 1.00   | 2.00   | 1.00   | 0.00  | 1.00   | 1.00   | 1.00   | 3.00               | 2.00  | 2.00  | 4.00  | 5.00   | 0.00  | 0.00  |
|       | rate of SR     | 0.00   | 0.00   | 0.00   | 0.00  | 0.00   | 0.00   | 0.00   | 0.00               | 0.00  | 0.00  | 0.00  | 0.00   | 0.00  | 0.00  |
| 18.00 |                | 0.00   | 1.00   | 0.00   | 0.00  | 3.00   | 0.00   | 0.00   | 1.00               | 2.00  | 4.00  | 4.00  | 1.00   | 2.00  | 4.00  |
|       | # of SR events | 1.00   | 1.00   | 1.00   | 0.00  | 0.00   | 1.00   | 1.00   | 2.00               | 0.00  | 1.00  | 0.00  | 4.00   | 0.00  | 0.00  |
|       | new papilloma  | 0.00   | 0.00   | 0.00   | 0.00  | 2.00   | 0.00   | 0.00   | 0.00               | 0.00  | 3.00  | 0.00  | 0.00   | 2.00  | 4.00  |
|       | rate of SR     | 100.00 | 50.00  | 100.00 | N/A   | 0.00   | 100.00 | 100.00 | 66.67              | 0.00  | 0.00  | 0.00  | 80.00  | N/A   | N/A   |
| 19.00 |                | 1.00   | 0.00   | 0.00   | 0.00  | 2.00   | 1.00   | 1.00   | 3.00               | 2.00  | 6.00  | 6.00  | 1.00   | 1.00  | 4.00  |
|       | # of SR events | 0.00   | 1.00   | 0.00   | 0.00  | 1.00   | 0.00   | 0.00   | 0.00               | 0.00  | 0.00  | 1.00  | 0.00   | 1.00  | 1.00  |
|       | new papilloma  | 1.00   | 0.00   | 0.00   | 0.00  | 0.00   | 1.00   | 1.00   | 2.00               | 0.00  | 2.00  | 3.00  | 0.00   | 0.00  | 1.00  |
|       | rate of SR     | N/A    | 100.00 | N/A    | N/A   | 33.33  | N/A    | N/A    | 0.00               | 0.00  | 0.00  | 0.00  | 0.00   | 50.00 | 25.00 |
| 20.00 |                | 0.00   | 2.00   | 0.00   | 1.00  | 2.00   | 0.00   | 3.00   | 5.00               | 4.00  | 8.00  | 4.00  | 0.00   | 1.00  | 1.00  |
|       | # of SR events | 1.00   | 0.00   | 0.00   | 0.00  | 0.00   | 1.00   | 0.00   | 0.00               | 0.00  | 0.00  | 2.00  | 1.00   | 0.00  | 3.00  |
|       | new papilloma  | 0.00   | 2.00   | 0.00   | 1.00  | 0.00   | 0.00   | 2.00   | 2.00               | 2.00  | 2.00  | 0.00  | 0.00   | 0.00  | 0.00  |
|       | rate of SR     | 100.00 | N/A    | N/A    | N/A   | 0.00   | 100.00 | 0.00   | 0.00               | 0.00  | 0.00  | 33.33 | 100.00 | 0.00  | 75.00 |
| 21.00 |                | 4.00   | 2.00   | 1.00   | 1.00  | 2.00   | 0.00   | 0.00   | 5.00               | 4.00  | 8.00  | 6.00  | 2.00   | 2.00  | 1.00  |
|       | # of SR events | 0.00   | 1.00   | 0.00   | 0.00  | 1.00   | 0.00   | 3.00   | 0.00               | 0.00  | 1.00  | 0.00  | 0.00   | 0.00  | 0.00  |
|       | new papilloma  | 4.00   | 1.00   | 1.00   | 0.00  | 1.00   | 0.00   | 0.00   | 0.00               | 0.00  | 1.00  | 2.00  | 2.00   | 1.00  | 0.00  |
|       | rate of SR     | N/A    | 50.00  | N/A    | 0.00  | 50.00  | N/A    | 100.00 | 0.00               | 0.00  | 12.50 | 0.00  | N/A    | 0.00  | 0.00  |
| 22.00 |                | 1.00   | 2.00   | 1.00   | 1.00  | 3.00   | 0.00   | 0.00   | 5.00               | 4.00  | 11.00 | 6.00  | 4.00   | 2.00  | 8.00  |
|       | # of SR events | 4.00   | 2.00   | 0.00   | 0.00  | 1.00   | 0.00   | 0.00   | 2.00               | 1.00  | 1.00  | 0.00  | 2.00   | 0.00  | 0.00  |
|       | new papilloma  | 1.00   | 0.00   | 0.00   | 0.00  | 2.00   | 0.00   | 0.00   | 7.00               | 1.00  | 4.00  | 0.00  | 4.00   | 0.00  | 7.00  |
|       | rate of SR     | 100.00 | 100.00 | 0.00   | 0.00  | 50.00  | N/A    | N/A    | 40.00              | 25.00 | 12.50 | 0.00  | 100.00 | 0.00  | 0.00  |
| 23.00 |                | 4.00   | 3.00   | 2.00   | 4.00  | 6.00   | 5.00   | 3.00   | 9.00               | 5.00  | 13.00 | 7.00  | 5.00   | 8.00  | 11.00 |
|       | # of SR events | 1.00   | 2.00   | 1.00   | 1.00  | 1.00   | 0.00   | 2.00   | 2.00               | 0.00  | 0.00  | 0.00  | 0.00   | 1.00  | 1.00  |
|       | new papilloma  | 4.00   | 3.00   | 2.00   | 4.00  | 4.00   | 5.00   | 5.00   | 6.00               | 1.00  | 2.00  | 1.00  | 1.00   | 7.00  | 4.00  |
|       | rate of SR     | 25.00  | 100.00 | N/A    | N/A   | 100.00 |        |        | 100.00             | 0.00  | 0.00  | N/A   | 0.00   | N/A   | N/A   |
| 24.00 |                | 1.00   | 2.00   | 3.00   | 3.00  | 4.00   | 2.00   | 1.00   | 7.00               | 5.00  | 11.00 | 8.00  | 3.00   | 4.00  | 8.00  |
|       | # of SR events | 3.00   | 1.00   | 2.00   | 1.00  | 2.00   | 5.00   | 3.00   | 2.00               | 0.00  | 2.00  | 1.00  | 2.00   | 4.00  | 3.00  |
|       | new papilloma  | 0.00   | 0.00   | 3.00   | 0.00  | 0.00   | 2.00   | 1.00   | 0.00               | 0.00  | 0.00  | 2.00  | 0.00   | 0.00  | 0.00  |
|       | rate of SR     | 75.00  | 33.33  | 100.00 | 25.00 | 33.33  | 100.00 | 100.00 | 22.22              | 0.00  | 15.38 | 14.29 | 40.00  | 50.00 | 27.27 |
| 25.00 |                | 2.00   | 7.00   | 2.00   | 3.00  | 7.00   | 8.00   | 3.00   | 9.00               | 6.00  | 13.00 | 13.00 | 7.00   | 9.00  | 15.00 |
|       | # of SR events | 0.00   | 2.00   | 3.00   | 0.00  | 0.00   | 2.00   | 1.00   | 1.00               | 0.00  | 0.00  | 0.00  | 0.00   | 0.00  | 1.00  |
|       | new papilloma  | 1.00   | 7.00   | 2.00   | 0.00  | 3.00   | 8.00   | 3.00   | 3.00               | 1.00  | 2.00  | 5.00  | 4.00   | 5.00  | 8.00  |
|       | rate of SR     | 0.00   | 100.00 | 100.00 | 0.00  | 0.00   | 100.00 | 100.00 | 14.29              | 0.00  | 0.00  | 0.00  | 0.00   | 0.00  | 12.50 |
| 26.00 |                | 2.00   | 7.00   | 2.00   | 3.00  | 3.00   | 4.00   | 0.00   | 10.00              | 5.00  | 15.00 | 8.00  | 5.00   | 5.00  | 14.00 |
|       | # of SR events | 2.00   | 6.00   | 1.00   | 1.00  | 4.00   | 5.00   | 3.00   | 1.00               | 1.00  | 0.00  | 5.00  | 2.00   | 4.00  | 1.00  |
|       | new papilloma  | 2.00   | 6.00   | 1.00   | 1.00  | 0.00   | 1.00   | 0.00   | 2.00               | 0.00  | 2.00  | 0.00  | 0.00   | 0.00  | 0.00  |
|       | rate of SR     | 100.00 | 85.71  | 50.00  | 33.33 | 57.14  | 62.50  | 100.00 | 11.11              | 16.67 | 0.00  | 38.46 | 28.57  | 44.44 | 6.67  |
| 26.50 |                | 2.00   | 4.00   | 3.00   | 4.00  | 7.00   | 6.00   | 4.00   | 14.00              | 6.00  | 16.00 | 12.00 | 5.00   | 8.00  | 12.00 |
|       | # of SR events | 2.00   | 3.00   | 2.00   | 0.00  | 2.00   | 2.00   | 0.00   | 0.00               | 0.00  | 0.00  | 1.00  | 0.00   | 0.00  | 2.00  |
|       | new papilloma  | 2.00   | 0.00   | 3.00   | 1.00  | 6.00   | 4.00   | 4.00   | 4.00               | 1.00  | 1.00  | 5.00  | 0.00   | 3.00  | 0.00  |
|       | rate of SR     | 100.00 | 42.86  | 100.00 | 0.00  | 66.67  | 50.00  | N/A    | 0.00               | 0.00  | 0.00  | 12.50 | 0.00   | 0.00  | 14.29 |
| 27.40 |                | 2.00   | 3.00   | 0.00   | 4.00  | 4.00   | 6.00   | 1.00   | 9.00               | 8.00  | 21.00 | 8.00  | 6.00   | 5.00  | 14.00 |
|       | # of SR events | 1.00   | 2.00   | 3.00   | 1.00  | 4.00   | 1.00   | 3.00   | 5.00               | 0.00  | 0.00  | 4.00  | 0.00   | 3.00  | 0.00  |
|       | new papilloma  | 1.00   | 1.00   | 0.00   | 1.00  | 1.00   | 1.00   | 0.00   | 0.00               | 2.00  | 5.00  | 0.00  | 1.00   | 0.00  | 2.00  |
|       | rate of SR     | 50.00  | 50.00  | 100.00 | 25.00 | 57.14  | 16.67  | 75.00  | 35.71              | 0.00  | 0.00  | 33.33 | 0.00   | 37.50 | 0.00  |

SR, spontaneous regression; rate of SR- percent of regressing papillomas
